# Supplementary material for: High serum C-X-C motif chemokine ligand 10 (CXCL10) levels may be associated with new onset interstitial lung disease in patients with systemic sclerosis: evidence from observational, clinical, transcriptomic and in vitro studies
Source: PubMed Central journal article supplement (PMC10708993; doi:10.1016/j.ebiom.2023.104883), 2023-11-22
Supplement: mmc7.pdf [file mmc7.pdf]

## Certificate of Analysis

### SPECIFICATIONS

| REAGENT          | PART NUMBER | # OF VIALS | AMOUNT PER VIAL | WORKING CONCENTRATION | LOT #      |
|------------------|-------------|------------|-----------------|-----------------------|------------|
| Capture          | 840420      | 3          | 120 µg          | 2.00 µg/mL            | ADN0621041 |
| Detection        | 840421      | 3          | 1.20 µg         | 20.0 ng/mL            | AAP1521041 |
| Standard         | 840422      | 3          | 55.0 ng         | 31.2-2000 pg/mL       | 1513403    |
| Streptavidin-HRP | 893975      | 3          | N/A             | 40-fold dilution      | P289330    |

### PREPARATION & STORAGE

Store unopened kit at 2-8 °C. Do not use past kit expiration date.

| REAGENT          | PREPARATION                                 | STORAGE OF OPENED/RECONSTITUTED MATERIAL                                                                                    |
|------------------|---------------------------------------------|-----------------------------------------------------------------------------------------------------------------------------|
| Capture          | Reconstitute with 0.5 mL of PBS             | Store at 2-8 °C for up to 8 weeks or aliquot and store at -20 °C to -70 °C in a manual defrost freezer for up to 12 weeks.* |
| Detection        | Reconstitute with 1.0 mL of Reagent Diluent |                                                                                                                             |
| Standard         | Reconstitute with 0.5 mL of Reagent Diluent | Store reconstituted standard at 2-8 °C for up to 8 weeks or aliquot and store at -70 °C for up to 12 weeks.*                |
| Streptavidin-HRP | Dilute with Reagent Diluent                 | Store undiluted at 2-8 °C for up to 12 weeks. DO NOT FREEZE.*                                                               |

\*Provided this is within the expiration date of the kit.

It is hereby certified that the above product has been tested for proper performance and function under our established Quality Control Testing criteria. It is authorized by our Quality Assurance program to be released for sale.

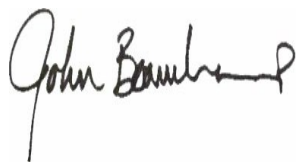

John Beauchamp  
Manager, Quality Assurance/Regulatory Affairs  
This C of A was updated on 7/30/2021, Rev. 0

For Research Use or Further Manufacturing Purposes Only
